# Supplementary material
Source: publisher figshare collection journal article supplement (https://sage.figshare.com/ndownloader/files/18209321)
Supplement: Supplementary file 1 [file 18209321]

*Data prep (no need to rerun - vars already included in database)
use "C:\Users\gpop\Google Drive\H_Legacy_Book\Left-Right Drafts\CPS\replication materials\Left auth CPS main db.dta"

gen xleft_nondem=0 if lr_self~=.&demind7~=.
replace xleft_nondem=1 if lr_self<=4&lr_self~=.& demind7<=0&demind7~=.

reg lr_self i.govtresp i.govtown i.ineqbad soc_lib_ind if lr_sample==1 [weight=wt1000], cluster(ctryyr)
predict lr_pred
gen xleft_nondem_pred=0 if lr_pred~=.&demind7~=.
replace xleft_nondem_pred=1 if lr_pred<=5.4&lr_pred~=.& demind7<=0&demind7~=.

gen yob_dec2=0 if yob<1920&yob~=.
replace yob_dec2=1 if yob>=1920&yob<1930
replace yob_dec2=2 if yob>=1930&yob<1940
replace yob_dec2=3 if yob>=1940&yob<1950
replace yob_dec2=4 if yob>=1950&yob<1960
replace yob_dec2=5 if yob>=1960&yob<1970
replace yob_dec2=6 if yob>=1970&yob<1980
replace yob_dec2=7 if yob>=1980

label define yobdec2 0 "Born pre-1920", replace
label define yobdec2 1 "Born 1920s", add
label define yobdec2 2 "Born 1930s", add
label define yobdec2 3 "Born 1940s", add
label define yobdec2 4 "Born 1950s", add
label define yobdec2 5 "Born 1960s", add
label define yobdec2 6 "Born 1970s", add
label define yobdec2 7 "Born post-1980", add
label  values yob_dec2 yobdec2

gen hardline6plus_all=stal6plus_all+nstl6plus_all
gen softline6plus_all=ptot6plus_all+ref6plus_all


clear all
use "C:\Users\gpop\Google Drive\H_Legacy_Book\Data\WVS\WVS9008 db Feb 2019.dta" 
keep demind7 demind7_st lr_self pc28ddr commall y1-y21 yr lr_sample weight wt_surv wt1000 ctrycode2 ctry ctryyr xleft_nondem lr_self demind7 yob yob_dec2 ///
comm6plus_all softline6plus_all hardline6plus_all stal6plus_all nstl6plus_all ptot6plus_all ref6plus_all comm617_all comm18plus_all age ///
urban20s100k landlocked disteq distgreenwich brit_col-rus_col turk_col otheur_col elevation_mean_km ln_gdpcap1914 liter20sc5 polity_preWWI politypreWWIXoverseascol overseas_col_1900_1915 imperial_occup_1900_1915 muslimmaj chrmaj ///
ef_fearonimp hieduimp secedimp primeduimp  lnincimp lnincmis subj_lnincimp subj_tot6 townmedi-town_mis urbanres maleimp malemis catholic protestant orthod muslim ///
collectiv_low pc_femlabpart_sub50 cp_fem_ratio comm617 comm18plus comm_army xleft_nondem_pred govtresp govtown ineqbad soc_lib_ind
save "C:\Users\gpop\Google Drive\H_Legacy_Book\Left-Right Drafts\CPS\replication materials\Left auth CPS main db.dta", replace

*Figure 1 DemXIdeol PC exceptionalism illustration
mixed demind7_st c.lr_self##c.lr_self##pc28ddr y7-y21 if lr_sample==1 [weight=weight] || ctryyr:, pweight(wt_surv)
margins, at(lr_self=(1 (1) 10) pc28ddr==(0 1))
marginsplot, ytitle("Democracy support", margin(small) size(small)) ///
xlabel(, labsize(vsmall)) ylabel(, labsize(small)) xtitle("Left-Right Orientation", margin(small) size(small)) ysize(7) xsize(7) yscale(range(-.1 .1)) ///
title(" ") scheme(s2mono)

mixed lr_self c.demind7_st##pc28ddr y7-y21 if lr_sample==1 [weight=weight] || ctryyr:, pweight(wt_surv)
margins, at(demind7_st=(-1 (.2) 1) pc28ddr==(0 1) )
marginsplot, ytitle("Left-Right Orientation", margin(small) size(small)) ///
xlabel(, labsize(vsmall)) ylabel(, labsize(small)) xtitle("Democracy support", margin(small) size(small)) ysize(7) xsize(7) yscale(range(5 6)) ///
title(" ") scheme(s2mono)
graph save ideoldem "C:\Users\gpop\Google Drive\H_Legacy_Book\Left-Right Drafts\ECPR April 2017\RR\ideoldem.gph", replace

graph  combine ideoldem.gph demideol.gph, col(2) ti(x) title("Fig.1 Democracy Support vs. Ideology: The Communist Legacy",  size(medsmall)) ///
caption("The left panel in Figure 1 is based on a HLM regression of Left-Right self-placement on the Democracy support index interacted" ///
        "with the post-communist citizen dummy variable plus a series of survey year dummies. It shows that post-communist citizens only" ///
		"exhibit a leftist bias among non-democrats. In the right panel, we regressed the Democracy support index on Left-Right self-placement" ///
		"interacted with the post-communist citizen dummy variable. It shows that only left-leaning post-communist citizens exhibit a democratic" ///
		"support deficit compared to their non-communist counterparts.", size(vsmall)) scheme(s2mono)

graph save "C:\Users\gpop\Google Drive\H_Legacy_Book\Left-Right Drafts\ECPR April 2017\RR\fig1 ideolXdem.gph", replace


*Figure 2
mixed xleft_nondem i.yob_dec2##i.pc28ddr##c.yr##c.yr age ///
urban20s100k landlocked disteq distgreenwich brit_col-rus_col turk_col otheur_col elevation_mean_km ln_gdpcap1914 liter20sc5 c.polity_preWWI##i.overseas_col_1900_1915 imperial_occup_1900_1915 muslimmaj chrmaj ///
if lr_sample==1 [weight=weight] || ctryyr:, pweight(wt_surv)
margins, dydx(pc28ddr) at(yr=(6 (1) 18) yob_dec2=(2 7))
marginsplot, ytitle("Post-communism effect on left-authoritarian probability", margin(small) size(small)) ///
xlabel(, labsize(vsmall)) ylabel(, labsize(small)) xtitle("Survey year", margin(small) size(small)) ysize(7) xsize(7) yscale(range(-.1 .1)) ///
yline(0, lpattern(shortdash)) title(" ") scheme(s2mono)


mixed xleft_nondem i.yob_dec##i.pc28ddr##c.yr##c.yr age ///
urban20s100k landlocked disteq distgreenwich brit_col-rus_col turk_col otheur_col elevation_mean_km ln_gdpcap1914 liter20sc5 c.polity_preWWI##i.overseas_col_1900_1915 imperial_occup_1900_1915 muslimmaj chrmaj ///
if lr_sample==1 [weight=weight] || ctryyr:, pweight(wt_surv)
margins, dydx(pc28ddr) at(yr=(6 (1) 18) yob_dec=(3 8))
marginsplot, ytitle("Post-communism effect on left-authoritarian probability", margin(small) size(small)) ///
xlabel(, labsize(vsmall)) ylabel(, labsize(small)) xtitle("Survey year", margin(small) size(small)) ysize(7) xsize(7) yscale(range(-.1 .1)) ///
yline(0, lpattern(shortdash)) title(" ") scheme(s2mono)

*Table 2 - Main exposure effects
set more off 
mixed xleft_nondem pc28ddr c.comm6plus_all age y7-y21 ///
urban20s100k landlocked disteq distgreenwich brit_col-rus_col turk_col otheur_col elevation_mean_km ln_gdpcap1914 liter20sc5 polity_preWWI politypreWWIXoverseascol overseas_col_1900_1915 imperial_occup_1900_1915 muslimmaj chrmaj ///
ef_fearonimp ///
hieduimp secedimp primeduimp  lnincimp lnincmis subj_lnincimp subj_tot6 townmedi-town_mis maleimp malemis ///
if lr_sample==1 [weight=weight] || ctryyr:, pweight(wt_surv)
outreg2 using tabcps2.doc, replace label dec(3) word symbol(**,*,#) nocons drop(y7-y21 lnincmis subj_lnincimp subj_tot6 town_mis malemis athmis)

*Figure 3 
margins, at(comm6plus_all=(0 (10) 60) pc28ddr=(0 1)) 
*Copy margins into "fig 3 exposure effects data" file and run graph from there

marginsplot, ytitle("Left-authoritarian probability", margin(small) size(small)) ///
xlabel(, labsize(vsmall)) ylabel(, labsize(small)) xtitle("Communist exposure", margin(small) size(small)) ysize(7) xsize(7)  ///
yline(0, lpattern(shortdash)) title(" ") scheme(s2mono)

mixed xleft_nondem c.comm6plus_all age y7-y21 ///
hieduimp secedimp primeduimp  lnincimp lnincmis subj_lnincimp subj_tot6 townmedi-town_mis maleimp malemis ///
i.ctry ///
if lr_sample==1 [weight=weight] || ctryyr:, pweight(wt_surv)
outreg2 using tabcps2.doc, append label dec(3) word symbol(**,*,#) nocons drop(y7-y21 lnincmis subj_lnincimp subj_tot6 town_mis malemis athmis)

mixed xleft_nondem pc28ddr hardline6plus_all softline6plus_all age y7-y21 ///
urban20s100k landlocked disteq distgreenwich brit_col-rus_col turk_col otheur_col elevation_mean_km ln_gdpcap1914 liter20sc5 polity_preWWI politypreWWIXoverseascol overseas_col_1900_1915 imperial_occup_1900_1915 muslimmaj chrmaj ///
ef_fearonimp ///
hieduimp secedimp primeduimp  lnincimp lnincmis subj_lnincimp subj_tot6 townmedi-town_mis maleimp malemis ///
if lr_sample==1 [weight=weight] || ctryyr:, pweight(wt_surv)
outreg2 using tabcps2.doc, append label dec(3) word symbol(**,*,#) nocons drop(y7-y21 lnincmis subj_lnincimp subj_tot6 town_mis malemis athmis)

mixed xleft_nondem hardline6plus_all softline6plus_all age y7-y21 ///
hieduimp secedimp primeduimp  lnincimp lnincmis subj_lnincimp subj_tot6 townmedi-town_mis maleimp malemis ///
i.ctry ///
if lr_sample==1 [weight=weight] || ctryyr:, pweight(wt_surv)
outreg2 using tabcps2.doc, append label dec(3) word symbol(**,*,#) nocons drop(y7-y21 lnincmis subj_lnincimp subj_tot6 town_mis malemis athmis)

mixed xleft_nondem pc28ddr comm617_all comm18plus_all age y7-y21 ///
urban20s100k landlocked disteq distgreenwich brit_col-rus_col turk_col otheur_col elevation_mean_km ln_gdpcap1914 liter20sc5 polity_preWWI politypreWWIXoverseascol overseas_col_1900_1915 imperial_occup_1900_1915 muslimmaj chrmaj ///
ef_fearonimp ///
hieduimp secedimp primeduimp  lnincimp lnincmis subj_lnincimp subj_tot6 townmedi-town_mis maleimp malemis ///
if lr_sample==1 [weight=weight] || ctryyr:, pweight(wt_surv)
outreg2 using tabcps2.doc, append label dec(3) word symbol(**,*,#) nocons drop(y7-y21 lnincmis subj_lnincimp subj_tot6 town_mis malemis athmis)

mixed xleft_nondem comm617_all comm18plus_all age y7-y21 ///
hieduimp secedimp primeduimp  lnincimp lnincmis subj_lnincimp subj_tot6 townmedi-town_mis maleimp malemis ///
i.ctry ///
if lr_sample==1 [weight=weight] || ctryyr:, pweight(wt_surv)
outreg2 using tabcps2.doc, append label dec(3) word symbol(**,*,#) nocons drop(y7-y21 lnincmis subj_lnincimp subj_tot6 town_mis malemis athmis)


*Figures 4-6 and Table A5 - Constrained regression 
reg xleft_nondem age  ///
hieduimp secedimp primeduimp lnincimp lnincmis subj_lnincimp subj_tot6 townmedi-town_mis maleimp malemis ///
y7-y21 if lr_sample==1&commall==0 [weight=wt1000], cluster(ctryyr)
constraint define 98 age=-.0009869

*Figure 4 and Table A5 models 1-3
*5.1 
cnsreg xleft_nondem c.comm6plus##catholic c.comm6plus##protestant c.comm6plus##orthod c.comm6plus##muslim age ///
hieduimp secedimp primeduimp lnincimp lnincmis subj_lnincimp subj_tot6 townmedi-town_mis maleimp malemis ///
y7-y21 if pc28ddr==1&lr_sample==1 [weight=wt1000], c(98) cluster(ctryyr)
outreg2 using tabcpsa2, replace label dec(4) word symbol(**,*,#) nocons drop(y7-y21 lnincmis subj_lnincimp subj_tot6 town_mis malemis )
margins, dydx(comm6plus) at(catholic=1 protestant=0 orthod=0 muslim=0)
margins, dydx(comm6plus) at(catholic=0 protestant=1 orthod=0 muslim=0)
margins, dydx(comm6plus) at(catholic=0 protestant=0 orthod=1 muslim=0)
margins, dydx(comm6plus) at(catholic=0 protestant=0 orthod=0 muslim=1)

*5.2 
cnsreg xleft_nondem c.comm6plus##relsvoft age ///
hieduimp secedimp primeduimp lnincimp lnincmis subj_lnincimp subj_tot6 townmedi-town_mis maleimp malemis ///
y7-y21 if pc28ddr==1&lr_sample==1 [weight=wt1000], c(98) cluster(ctryyr)
outreg2 using tabcpsa2, append label dec(4) word symbol(**,*,#) nocons drop(y7-y21 lnincmis subj_lnincimp subj_tot6 town_mis malemis )
margins, dydx(comm6plus) at(relsvoft=(0 1))


*5.3 
cnsreg xleft_nondem c.comm6plus##relsvoft##catholic c.comm6plus##relsvoft##protestant c.comm6plus##relsvoft##orthod c.comm6plus##relsvoft##muslim age ///
hieduimp secedimp primeduimp lnincimp lnincmis subj_lnincimp subj_tot6 townmedi-town_mis maleimp malemis ///
y7-y21 if pc28ddr==1&lr_sample==1 [weight=wt1000], c(98) cluster(ctryyr)
outreg2 using tabcpsa2, append label dec(4) word symbol(**,*,#) nocons drop(y7-y21 lnincmis subj_lnincimp subj_tot6 town_mis malemis )
margins, dydx(comm6plus) at(relsvoft=1 catholic=1 protestant=0 orthod=0 muslim=0)
margins, dydx(comm6plus) at(relsvoft=1 catholic=0 protestant=1 orthod=0 muslim=0)
margins, dydx(comm6plus) at(relsvoft=1 catholic=0 protestant=0 orthod=1 muslim=0)
margins, dydx(comm6plus) at(relsvoft=1 catholic=0 protestant=0 orthod=0 muslim=1)
margins, dydx(comm6plus) at(relsvoft=0 catholic=1 protestant=0 orthod=0 muslim=0)
margins, dydx(comm6plus) at(relsvoft=0 catholic=0 protestant=1 orthod=0 muslim=0)
margins, dydx(comm6plus) at(relsvoft=0 catholic=0 protestant=0 orthod=1 muslim=0)
margins, dydx(comm6plus) at(relsvoft=0 catholic=0 protestant=0 orthod=0 muslim=1)

*Copy margins into fig 4 religion intx data file and run graph from there

*Figure 4 and Table A5 models 4

*3.4 Larger exposure effects for urban residents
cnsreg xleft_nondem c.comm6plus##urbanres age ///
hieduimp secedimp primeduimp lnincimp lnincmis subj_lnincimp subj_tot6 maleimp malemis ///
y7-y21 if pc28ddr==1&lr_sample==1 [weight=wt1000], c(98) cluster(ctryyr)
margins, dydx(comm6plus) at(urbanres=(0 1))
outreg2 using tabcpsa2, append label dec(4) word symbol(**,*,#) nocons drop(y1-y3 y5 y7-y21 lnincmis subj_lnincimp subj_tot6 town_mis malemis )

*3.5 Urban-rural difference only matters in low collectivization countries
cnsreg xleft_nondem c.comm6plus##urbanres##collectiv_low age ///
hieduimp secedimp primeduimp lnincimp lnincmis subj_lnincimp subj_tot6 maleimp malemis age ///
y7-y21 if pc28ddr==1&lr_sample==1 [weight=wt1000], c(98) cluster(ctryyr)
margins, dydx(comm6plus) at(collectiv_low=(0 1) urbanres=(0 1))
outreg2 using tabcpsa2, append label dec(4) word symbol(**,*,#) nocons drop(y1-y3 y5 y7-y21 lnincmis subj_lnincimp subj_tot6 town_mis malemis )

*3.6 Urban-rural difference not due to differences in religious attendance
cnsreg xleft_nondem c.comm6plus##urbanres##relsvoft age ///
hieduimp secedimp primeduimp lnincimp lnincmis subj_lnincimp subj_tot6 maleimp malemis age ///
y7-y21 if pc28ddr==1&lr_sample==1 [weight=wt1000], c(98) cluster(ctryyr)
margins, dydx(comm6plus) at(relsvoft=(1 0) urbanres=(0 1))
outreg2 using tabcpsa2, append label dec(4) word symbol(**,*,#) nocons drop(y1-y3 y5 y7-y21 lnincmis subj_lnincimp subj_tot6 town_mis malemis )

*Copy margins into "fig 5 urban intx data" file and run graph from there
 
**3.7 Larger exposure effects for men 
cnsreg xleft_nondem c.comm6plus##male age  ///
hieduimp secedimp primeduimp lnincimp lnincmis subj_lnincimp subj_tot6 	  ///
y7-y21 if pc28ddr==1&lr_sample==1 [weight=wt1000], c(98) cluster(ctryyr)
*margins, dydx(comm6plus) at(male=(0 1))
outreg2 using tabcpsa2, append label dec(4) word symbol(**,*,#) nocons drop(y1-y3 y5 y7-y21 lnincmis subj_lnincimp subj_tot6 town_mis malemis )

*3.8 Lower female exposure effect is largely due to higher church attendance (but no evidence that church attendance affects women more)
cnsreg xleft_nondem c.comm6plus##male##relsvoft age  ///
hieduimp secedimp primeduimp lnincimp lnincmis subj_lnincimp subj_tot6 townmedi-town_mis	  ///
y1-y3 y5 y7-y21 if pc28ddr==1&lr_sample==1 [weight=wt1000], c(98) cluster(ctryyr)
outreg2 using tabcpsa2, append label dec(4) word symbol(**,*,#) nocons drop(y1-y3 y5 y7-y21 lnincmis subj_lnincimp subj_tot6 town_mis malemis )
*margins, dydx(comm6plus) at(male=(0 1) relsvoft=(1 0))


**3.9 No evidence that women in low female labor participation countries are affected less
cnsreg xleft_nondem c.comm18plus##male##pc_femlabpart_sub50 c.comm617##male age  ///
hieduimp secedimp primeduimp lnincimp lnincmis subj_lnincimp subj_tot6 townmedi-town_mis  ///
y7-y21 if pc28ddr==1&lr_sample==1 [weight=wt1000], c(98) cluster(ctryyr)
outreg2 using tabcpsa2, append label dec(4) word symbol(**,*,#) nocons drop(y1-y3 y5 y7-y21 lnincmis subj_lnincimp subj_tot6 town_mis malemis )
*margins, dydx(comm18plus) at(male=(0 1) pc_femlabpart_sub50=(1 0))


*3.10 No evidence that women in low female CP membership countries are affected less
*merge ctrywvs using "C:\Users\gpop\Google Drive\H_Legacy_Book\Data\WVS\LiTS CP gender ratio for WVS.dta", keep(femalecp cp_fem_ratio) nokeep
cnsreg xleft_nondem c.comm18plus##male##c.cp_fem_ratio c.comm617##male age  ///
hieduimp secedimp primeduimp lnincimp lnincmis subj_lnincimp subj_tot6 townmedi-town_mis  ///
y7-y21 if pc28ddr==1&lr_sample==1 [weight=wt1000], c(98) cluster(ctryyr)
outreg2 using tabcpsa2, append label dec(4) word symbol(**,*,#) nocons drop(y1-y3 y5 y7-y21 lnincmis subj_lnincimp subj_tot6 town_mis malemis )
*margins, dydx(comm18plus) at(cp_fem_ratio=(.2 .45) male=(0 1))

*3.11 No evidence that army under communism matters
cnsreg xleft_nondem c.comm18plus##male##comm_army c.comm617##male age  ///
hieduimp secedimp primeduimp lnincimp lnincmis subj_lnincimp subj_tot6 townmedi-town_mis	  ///
y7-y21 if pc28ddr==1&lr_sample==1 [weight=wt1000], c(98) cluster(ctryyr)
outreg2 using tabcpsa2, append label dec(4) word symbol(**,*,#) nocons drop(y1-y3 y5 y7-y21 lnincmis subj_lnincimp subj_tot6 town_mis malemis )
margins, dydx(comm18plus) at(comm_army=(0 1) male=1)
margins, dydx(comm18plus) at(comm_army=0 male=0)

*Copy margins into "fig 6 gender intx data file" and run graph from there


**Appendix tables & Figures

*Figure A1 Left-right orientation by ctry
collapse (mean) lr_self pc28ddr commall (firstnm) ctrycode2 [weight=wt1000], by(ctry)
drop if lr_self==.
drop if pc28ddr==0&commall==1
sort lr_self
gen nr=1
replace nr=nr[_n-1]+1 if nr[_n-1]~=.
gen byte even = !mod(nr,2)

twoway (bar lr_self nr if pc28ddr==0&commall==0, sort msymbol(none) fcolor(gs12) lcolor(none) ///
 mlabsize(tiny) mlabcolor(gs12)) ///
(bar lr_self nr if pc28ddr==1, sort msymbol(none) fcolor(gs2) lcolor(none) ///
 mlabsize(tiny) mlabcolor(gs2)) ///
(scatter lr_self nr if pc28ddr==1&lr_self<0&even==0, sort msymbol(none) mlabel(ctrycode2) mlabgap(zero) mlabposition(6) ///
 mlabsize(tiny) mlabcolor(gs2)) ///
(scatter lr_self nr if pc28ddr==1&lr_self<0&even==1, sort msymbol(none) mlabel(ctrycode2) mlabgap(tiny) mlabposition(6) ///
 mlabsize(tiny) mlabcolor(gs2)) ///
(scatter lr_self nr if pc28ddr==1&lr_self>=0&even==0, sort msymbol(none) mlabel(ctrycode2) mlabgap(zero) mlabposition(12) ///
 mlabsize(tiny) mlabcolor(gs2)) ///
(scatter lr_self nr if pc28ddr==1&lr_self>=0&even==1, sort msymbol(none) mlabel(ctrycode2) mlabgap(tiny) mlabposition(12) ///
 mlabsize(tiny) mlabcolor(gs2)) ///
 , ylabel(1(1)8, labsize(small)) ytitle(L-R Orientation, margin(small) size(small)) xlabel(,nolabel) xtitle("Country", margin(small) size(small)) ysize(7) xsize(7) xscale(range(1 90))  ///
title(Figure A1: Average L-R Orientation by Country:, ///
size(medsmall) margin(tiny)) ///
sub(Ex-communist vs. Non-communist, ///
size(medsmall) margin(tiny)) legend(off) scheme(s2mono)


*Figure A2 Left-authoritarianism by ctry
collapse (mean) xleft_nondem pc28ddr commall (firstnm) ctrycode2 [weight=wt1000], by(ctry)
drop if xleft_nondem==.
drop if pc28ddr==0&commall==1
sort xleft_nondem
gen nr=1
replace nr=nr[_n-1]+1 if nr[_n-1]~=.
gen byte even = !mod(nr,2)

twoway (bar xleft_nondem nr if pc28ddr==0&commall==0, sort msymbol(none) fcolor(gs12) lcolor(none) ///
 mlabsize(tiny) mlabcolor(gs12)) ///
(bar xleft_nondem nr if pc28ddr==1, sort msymbol(none) fcolor(gs2) lcolor(none) ///
 mlabsize(tiny) mlabcolor(gs2)) ///
(scatter xleft_nondem nr if pc28ddr==1&xleft_nondem<0&even==0, sort msymbol(none) mlabel(ctrycode2) mlabgap(zero) mlabposition(6) ///
 mlabsize(tiny) mlabcolor(gs2)) ///
(scatter xleft_nondem nr if pc28ddr==1&xleft_nondem<0&even==1, sort msymbol(none) mlabel(ctrycode2) mlabgap(tiny) mlabposition(6) ///
 mlabsize(tiny) mlabcolor(gs2)) ///
(scatter xleft_nondem nr if pc28ddr==1&xleft_nondem>=0&even==0, sort msymbol(none) mlabel(ctrycode2) mlabgap(zero) mlabposition(12) ///
 mlabsize(tiny) mlabcolor(gs2)) ///
(scatter xleft_nondem nr if pc28ddr==1&xleft_nondem>=0&even==1, sort msymbol(none) mlabel(ctrycode2) mlabgap(tiny) mlabposition(12) ///
 mlabsize(tiny) mlabcolor(gs2)) ///
 , ylabel(0(.05).3, labsize(small)) ytitle(Left-authoritarian share, margin(small) size(small)) xlabel(,nolabel) xtitle("Country", margin(small) size(small)) ysize(7) xsize(7) xscale(range(1 90))  ///
title(Figure A2: Share of Left Authoritarians by Country:, ///
size(medsmall) margin(tiny)) ///
sub(Ex-communist vs. Non-communist, ///
size(medsmall) margin(tiny)) legend(off) scheme(s2mono)
clear all

*Table A1 - country-level summary stats
summ urban20s100k landlocked disteq distgreenwich brit_col-rus_col turk_col otheur_col elevation_mean_km ln_gdpcap1914 liter20sc5 polity_preWWI overseas_col_1900_1915 imperial_occup_1900_1915 muslimmaj chrmaj ef_fearonimp if demind7~=.&lr_self~=.&lr_sample==1 [weight=wt1000], sep(0)
summ collectiv_low pc_femlabpart_sub50 cp_fem_ratio if pc28ddr==1&demind7~=.&lr_self~=.&lr_sample==1 [weight=wt1000], sep(0)


*Table A2 individual-level summary stats
summ xleft_nondem lr_self demind7 pc28ddr comm6plus_all comm617_all comm18plus_all ///
hieduimp secedimp primeduimp lnincimp  townmedi-citylgi maleimp age ///
if demind7~=.&lr_self~=.&lr_sample==1 [weight=wt1000], sep(0)
summ catholic protestant orthod muslim relsvoft comm_army ///
if demind7~=.&lr_self~=.&lr_sample==1&pc28ddr==1 [weight=wt1000], sep(0)


*Table A4 - main exposure effects using probit + clustered SEs
set more off
tabulate ctry, gen(ctry)

dprobit xleft_nondem pc28ddr comm6plus_all age y7-y21 ///
urban20s100k landlocked disteq distgreenwich brit_col-rus_col turk_col otheur_col elevation_mean_km ln_gdpcap1914 liter20sc5 polity_preWWI politypreWWIXoverseascol overseas_col_1900_1915 imperial_occup_1900_1915 muslimmaj chrmaj ///
ef_fearonimp ///
hieduimp secedimp primeduimp  lnincimp lnincmis subj_lnincimp subj_tot6 townmedi-town_mis maleimp malemis ///
if lr_sample==1 [pweight=wt1000], cluster(ctryyr)
outreg2 using tabcpsa4.doc, replace label dec(3) word symbol(**,*,#) nocons drop(y7-y21 lnincmis subj_lnincimp subj_tot6 town_mis malemis athmis)

dprobit xleft_nondem comm6plus_all age y7-y21 ///
hieduimp secedimp primeduimp  lnincimp lnincmis subj_lnincimp subj_tot6 townmedi-town_mis maleimp malemis ///
ctry1-ctry93 ///
if lr_sample==1 [pweight=wt1000], cluster(ctryyr)
outreg2 using tabcpsa4.doc, append label dec(3) word symbol(**,*,#) nocons drop(y7-y21 lnincmis subj_lnincimp subj_tot6 town_mis malemis athmis)

dprobit xleft_nondem pc28ddr hardline6plus_all softline6plus_all age y7-y21 ///
urban20s100k landlocked disteq distgreenwich brit_col-rus_col turk_col otheur_col elevation_mean_km ln_gdpcap1914 liter20sc5 polity_preWWI politypreWWIXoverseascol overseas_col_1900_1915 imperial_occup_1900_1915 muslimmaj chrmaj ///
ef_fearonimp ///
hieduimp secedimp primeduimp  lnincimp lnincmis subj_lnincimp subj_tot6 townmedi-town_mis maleimp malemis ///
if lr_sample==1 [pweight=wt1000], cluster(ctryyr)
outreg2 using tabcpsa4.doc, append label dec(3) word symbol(**,*,#) nocons drop(y7-y21 lnincmis subj_lnincimp subj_tot6 town_mis malemis athmis)

dprobit xleft_nondem hardline6plus_all softline6plus_all age y7-y21 ///
hieduimp secedimp primeduimp  lnincimp lnincmis subj_lnincimp subj_tot6 townmedi-town_mis maleimp malemis ///
ctry1-ctry93 ///
if lr_sample==1 [pweight=wt1000], cluster(ctryyr)
outreg2 using tabcpsa4.doc, append label dec(3) word symbol(**,*,#) nocons drop(y7-y21 lnincmis subj_lnincimp subj_tot6 town_mis malemis athmis)

dprobit xleft_nondem pc28ddr comm617_all comm18plus_all age y7-y21 ///
urban20s100k landlocked disteq distgreenwich brit_col-rus_col turk_col otheur_col elevation_mean_km ln_gdpcap1914 liter20sc5 polity_preWWI politypreWWIXoverseascol overseas_col_1900_1915 imperial_occup_1900_1915 muslimmaj chrmaj ///
ef_fearonimp ///
hieduimp secedimp primeduimp  lnincimp lnincmis subj_lnincimp subj_tot6 townmedi-town_mis maleimp malemis ///
if lr_sample==1 [pweight=wt1000], cluster(ctryyr)
outreg2 using tabcpsa4.doc, append label dec(3) word symbol(**,*,#) nocons drop(y7-y21 lnincmis subj_lnincimp subj_tot6 town_mis malemis athmis)

dprobit xleft_nondem comm617_all comm18plus_all age y7-y21 ///
hieduimp secedimp primeduimp  lnincimp lnincmis subj_lnincimp subj_tot6 townmedi-town_mis maleimp malemis ///
ctry1-ctry93 ///
if lr_sample==1 [pweight=wt1000], cluster(ctryyr)
outreg2 using tabcpsa4.doc, append label dec(3) word symbol(**,*,#) nocons drop(y7-y21 lnincmis subj_lnincimp subj_tot6 town_mis malemis athmis)
drop ctry1-ctry93


*Table A6 - Probit regression using synthetic left-right indicator 
 
dprobit xleft_nondem_pred pc28ddr comm6plus_all age y7-y21 ///
urban20s100k landlocked disteq distgreenwich brit_col-rus_col turk_col otheur_col elevation_mean_km ln_gdpcap1914 liter20sc5 polity_preWWI politypreWWIXoverseascol overseas_col_1900_1915 imperial_occup_1900_1915 muslimmaj chrmaj ///
ef_fearonimp ///
hieduimp secedimp primeduimp  lnincimp lnincmis subj_lnincimp subj_tot6 townmedi-town_mis maleimp malemis ///
if lr_sample==1 [pweight=wt1000], cluster(ctryyr)
outreg2 using tabcpsa6.doc, replace label dec(4) word symbol(**,*,#) nocons drop(y7-y21 lnincmis subj_lnincimp subj_tot6 town_mis malemis athmis)

dprobit xleft_nondem_pred comm6plus_all age y7-y21 ///
hieduimp secedimp primeduimp  lnincimp lnincmis subj_lnincimp subj_tot6 townmedi-town_mis maleimp malemis ///
ctry1-ctry93 ///
if lr_sample==1 [pweight=wt1000], cluster(ctryyr)
outreg2 using tabcpsa6.doc, append label dec(4) word symbol(**,*,#) nocons drop(y7-y21 lnincmis subj_lnincimp subj_tot6 town_mis malemis athmis)

dprobit xleft_nondem_pred pc28ddr hardline6plus_all softline6plus_all age y7-y21 ///
urban20s100k landlocked disteq distgreenwich brit_col-rus_col turk_col otheur_col elevation_mean_km ln_gdpcap1914 liter20sc5 polity_preWWI politypreWWIXoverseascol overseas_col_1900_1915 imperial_occup_1900_1915 muslimmaj chrmaj ///
ef_fearonimp ///
hieduimp secedimp primeduimp  lnincimp lnincmis subj_lnincimp subj_tot6 townmedi-town_mis maleimp malemis ///
if lr_sample==1 [pweight=wt1000], cluster(ctryyr)
outreg2 using tabcpsa6.doc, append label dec(4) word symbol(**,*,#) nocons drop(y7-y21 lnincmis subj_lnincimp subj_tot6 town_mis malemis athmis)

dprobit xleft_nondem_pred hardline6plus_all softline6plus_all age y7-y21 ///
hieduimp secedimp primeduimp  lnincimp lnincmis subj_lnincimp subj_tot6 townmedi-town_mis maleimp malemis ///
ctry1-ctry93 ///
if lr_sample==1 [pweight=wt1000], cluster(ctryyr)
outreg2 using tabcpsa6.doc, append label dec(4) word symbol(**,*,#) nocons drop(y7-y21 lnincmis subj_lnincimp subj_tot6 town_mis malemis athmis)


dprobit xleft_nondem_pred pc28ddr comm617_all comm18plus_all age y7-y21 ///
urban20s100k landlocked disteq distgreenwich brit_col-rus_col turk_col otheur_col elevation_mean_km ln_gdpcap1914 liter20sc5 polity_preWWI politypreWWIXoverseascol overseas_col_1900_1915 imperial_occup_1900_1915 muslimmaj chrmaj ///
ef_fearonimp ///
hieduimp secedimp primeduimp  lnincimp lnincmis subj_lnincimp subj_tot6 townmedi-town_mis maleimp malemis ///
if lr_sample==1 [pweight=wt1000], cluster(ctryyr)
outreg2 using tabcpsa6.doc, append label dec(4) word symbol(**,*,#) nocons drop(y7-y21 lnincmis subj_lnincimp subj_tot6 town_mis malemis athmis)

dprobit xleft_nondem_pred comm617_all comm18plus_all age y7-y21 ///
hieduimp secedimp primeduimp  lnincimp lnincmis subj_lnincimp subj_tot6 townmedi-town_mis maleimp malemis ///
ctry1-ctry93 ///
if lr_sample==1 [pweight=wt1000], cluster(ctryyr)
outreg2 using tabcpsa6.doc, append label dec(4) word symbol(**,*,#) nocons drop(y7-y21 lnincmis subj_lnincimp subj_tot6 town_mis malemis athmis)
drop ctry1-ctry93


mixed lr_self pc28ddr##c.yr##c.yr age ///
urban20s100k landlocked disteq distgreenwich brit_col-rus_col turk_col otheur_col elevation_mean_km ln_gdpcap1914 liter20sc5 c.polity_preWWI##i.overseas_col_1900_1915 imperial_occup_1900_1915 muslimmaj chrmaj ///
if lr_sample==1 [weight=weight] || ctryyr:, pweight(wt_surv)
margins, dydx(pc28ddr) at(yr=(1 (2) 19))
marginsplot, ytitle("", margin(small) size(small)) ///
xlabel(, labsize(vsmall)) ylabel(, labsize(small)) xtitle("Survey year", margin(small) size(small)) ysize(7) xsize(7) yscale(range(-.1 .1)) ///
yline(0, lpattern(shortdash)) title(" ") scheme(s2mono)


*Figure A2 - Quadratic exposure effects
set more off 
mixed xleft_nondem pc28ddr c.comm6plus_all##c.comm6plus_all age y7-y21 ///
urban20s100k landlocked disteq distgreenwich brit_col-rus_col turk_col otheur_col elevation_mean_km ln_gdpcap1914 liter20sc5 polity_preWWI politypreWWIXoverseascol overseas_col_1900_1915 imperial_occup_1900_1915 muslimmaj chrmaj ///
ef_fearonimp ///
hieduimp secedimp primeduimp  lnincimp lnincmis subj_lnincimp subj_tot6 townmedi-town_mis maleimp malemis ///
if lr_sample==1 [weight=weight] || ctryyr:, pweight(wt_surv)

margins, at(comm6plus_all=(0 (10) 50) pc28ddr=(0 1)) 
*Copy margins into "fig 3 exposure effects data" file and run graph from there

 
